# Supplementary material for: Development and Pharmacokinetic Evaluation of Novasomes for the Trans-nasal Delivery of Fluvoxamine Using Arachidonic Acid-Carboxymethyl Chitosan Conjugate
Source: MDPI journal article supplement (doi:10.3390/pharmaceutics15092259), 2023-08-31
Supplement: s1 [file s1]

**Novasomes for the transnasal delivery of fluvoxamine using arachidonic acid-carboxymethyl chitosan conjugate: Permeation, mucoadhesion and pharmacokinetic evaluation**

**1. (Proton-nuclear magnetic resonance)  $^1\text{H}$ -NMR spectroscopy**

**$^1\text{H}$ -NMR of carboxymethyl chitosan (CMCS)**

$^1\text{H}$  NMR,  $\delta$  4.66 (dq, 1H), 4.23 (d, 1H), 4.14 (s, 2H), 3.92 (q, 1H), 3.90 – 3.83 (m, 2H), 3.83 – 3.71 (m, 2H), 3.69 (dd, 1H), 3.65 – 3.55 (m, 2H), 3.42 – 3.35 (m, 8H)

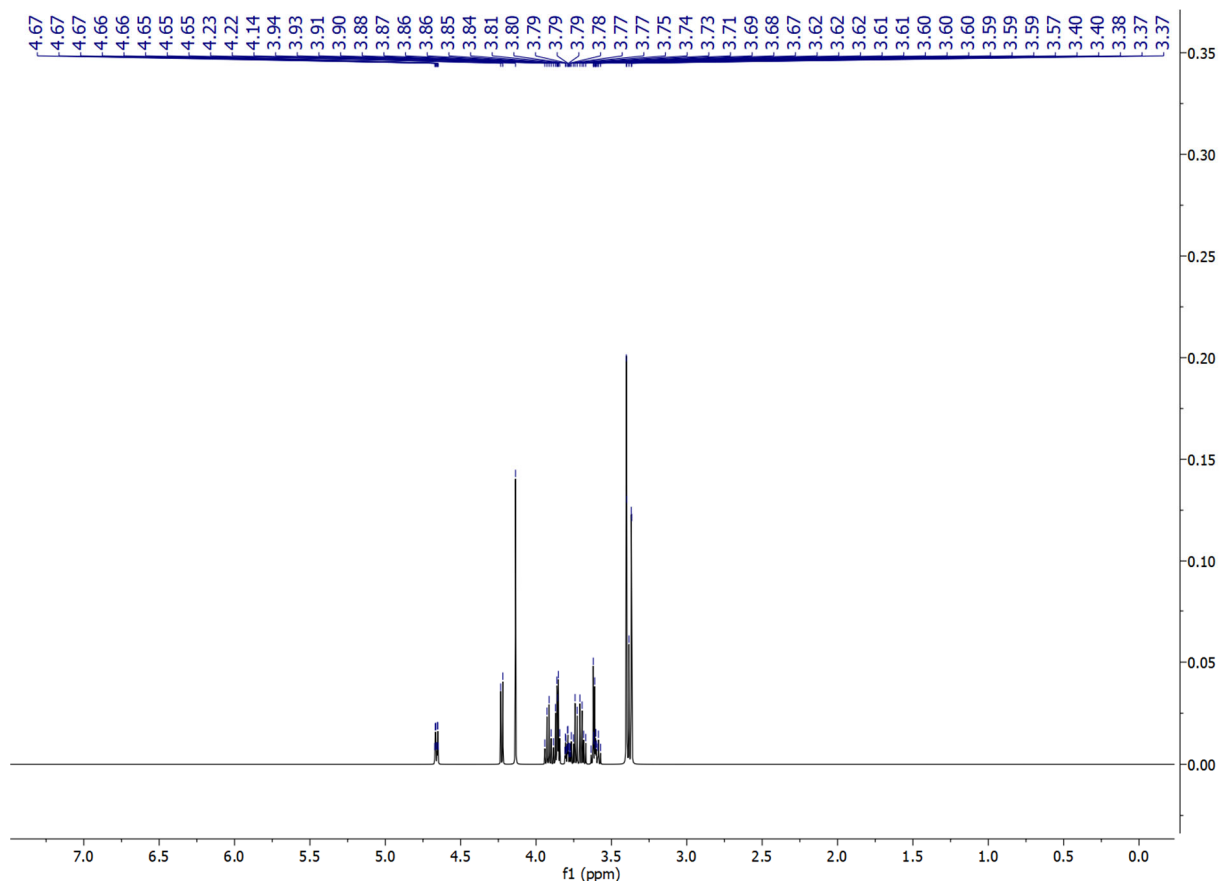

**Figure S1.**  $^1\text{H}$ -NMR of CMCS.

### **<sup>1</sup>H-NMR of arachidonic acid (AA)**

<sup>1</sup>H NMR, δ 5.52 – 5.41 (m, 6H), 5.41 – 5.30 (m, 2H), 3.64 (qd, 2H), 2.68 (ddp, 6H), 2.26 (t, 2H), 2.10 (dtt, 2H), 2.04 (tdd, 2H), 1.65 (p, 2H), 1.38 – 1.29 (m, 2H), 1.26 – 1.17 (m, 4H), 0.93 – 0.82 (m, 3H)

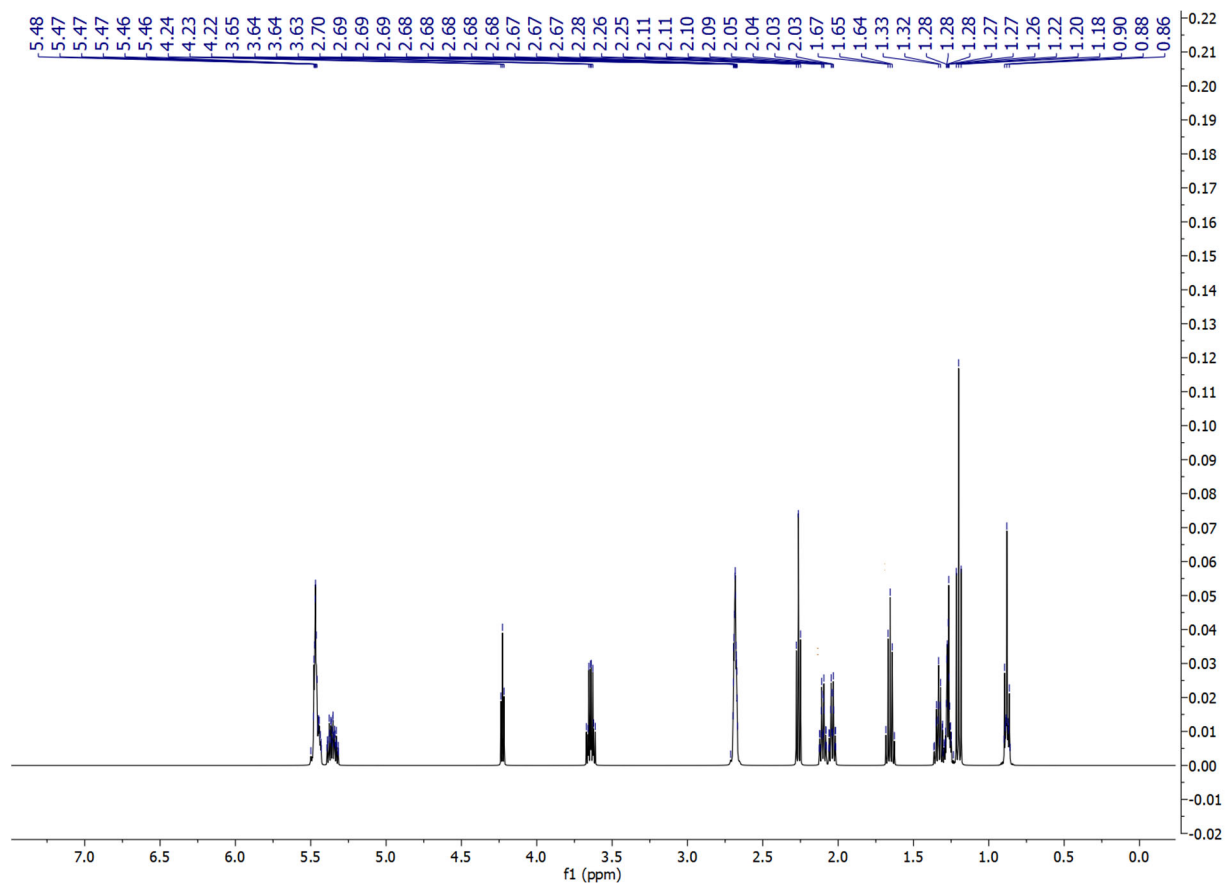

**Figure S2.**  $^1\text{H}$ -NMR of AA.

### **$^1\text{H}$ -NMR of arachidonic acid-carboxymethyl chitosan (AA-CMCS) conjugate**

$^1\text{H}$  NMR,  $\delta$  5.55 – 5.44 (m, 14H), 5.42 – 5.30 (m, 4H), 4.96 (dq, 2H), 4.78 (d, 2H), 4.16 – 4.06 (m, 6H), 3.94 (q, 2H), 3.83 – 3.77 (m, 3H), 3.77 – 3.66 (m, 3H), 3.47 (d, 6H), 3.40 – 3.31 (m, 8H), 2.73 – 2.64 (m, 2H), 2.60 – 2.50 (m, 6H), 2.50 – 2.45 (m, 3H), 2.45 – 2.40 (m, 1H), 2.39 – 2.30 (m, 4H), 2.16 – 2.07 (m, 3H), 2.07 – 1.99 (m, 4H), 1.99 – 1.93 (m, 1H), 1.79 – 1.64 (m, 4H), 1.38 – 1.19 (m, 11H), 0.94 – 0.84 (m, 6H).

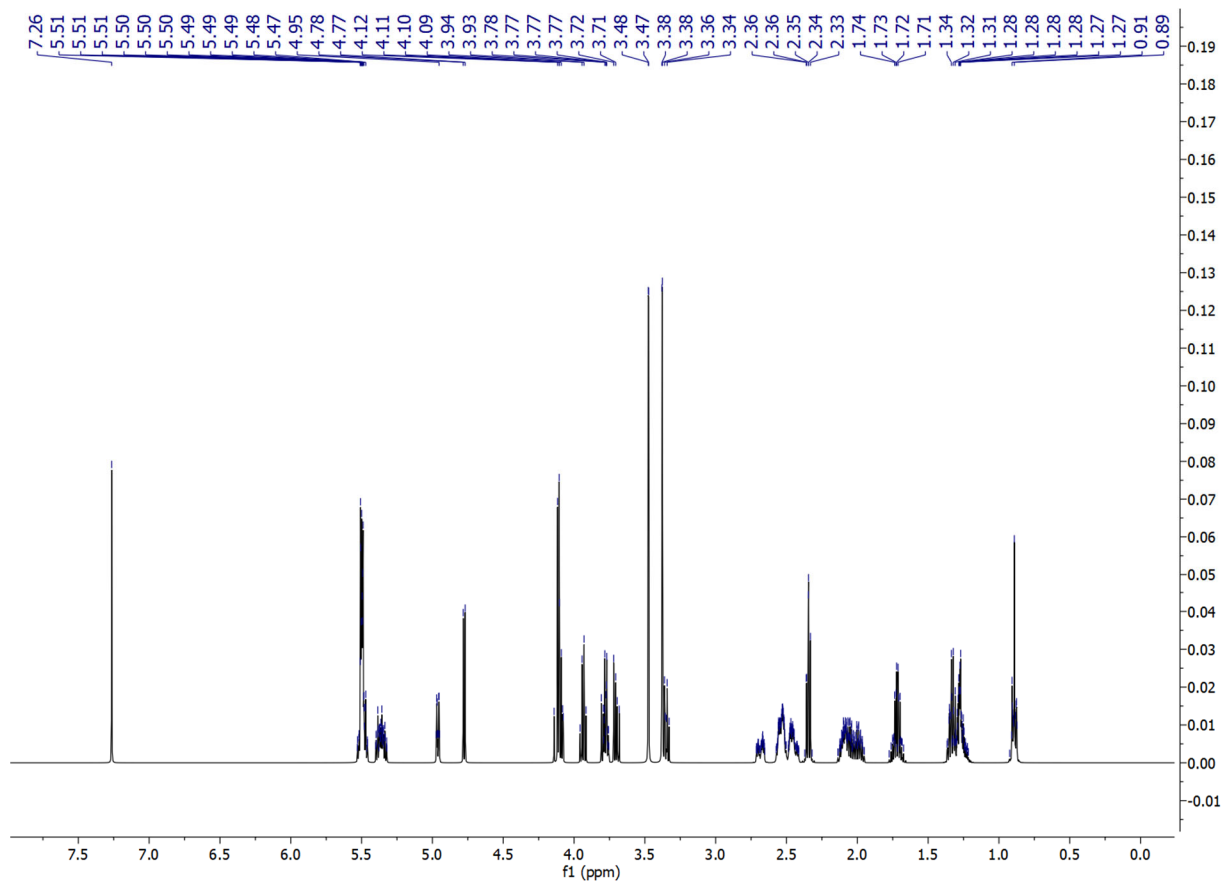

**Figure S3.**  $^1\text{H}$ -NMR of AA-CMCS.

## 2. Experimental Design

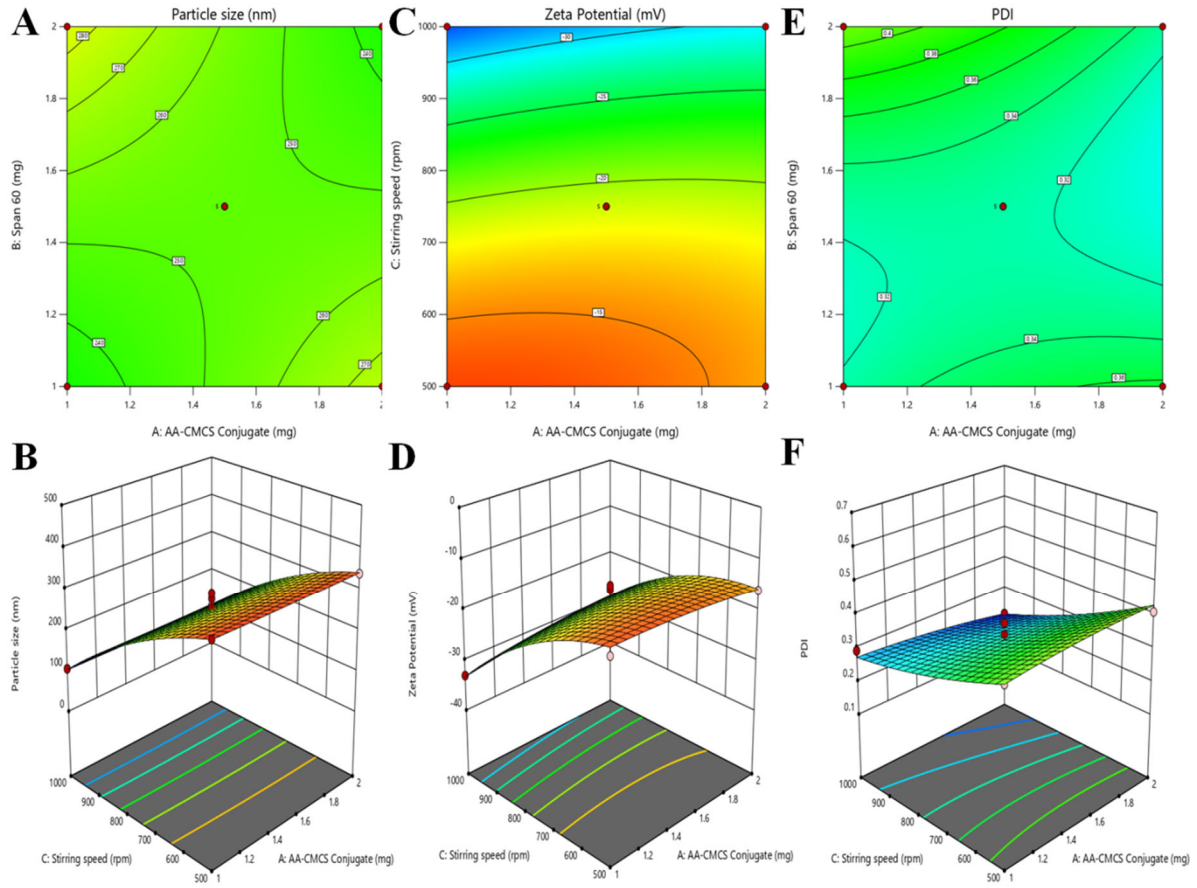

**Figure S4.** Contour and 3D graphs showing the effect of AA-CMCS conjugate, span 60 and stirring speed on the particle size (A and B), zeta potential (C and D) and PDI (E and F).

### 3. Entrapment efficiency and drug loading

**Table S1.** Values of % EE and % drug loaded in novasomes.

| Code  | % EE        | Drug loading (%) |
|-------|-------------|------------------|
| NAC1  | 59.56±1.453 | 56.45±2.123      |
| NAC2  | 67.34±1.089 | 62.67±2.872      |
| NAC3  | 71.67±2.981 | 69.81±1.845      |
| NAC4  | 56.45±1.652 | 50.91±1.034      |
| NAC5  | 78.40±1.789 | 74.38±1.1405     |
| NAC6  | 81.34±1.021 | 76.32±1.629      |
| NAC7  | 49.81±2.098 | 43.21±2.845      |
| NAC8  | 90.92±1.567 | 87.65±2.085      |
| NAC9  | 82.45±1.043 | 74.31±2.897      |
| NAC10 | 80.90±1.498 | 76.59±3.653      |
| NAC11 | 67.92±1.619 | 61.34±1.980      |
| NAC12 | 75.39±2.923 | 69.81±2.653      |
| NAC13 | 63.34±3.678 | 55.62±4.821      |
| NAC14 | 53.21±2.937 | 45.98±2.874      |
| NAC15 | 59.82±3.452 | 54.32±2.980      |
| NAC16 | 78.45±3.765 | 72.89±3.987      |
| NAC17 | 80.67±3.591 | 74.32±3.678      |

#### 4. Release kinetics of FVM

**Table S2.** The kinetic parameters of FVM release from novasomes at pH 7.4.

| <b>Code</b> | <b>Zero order</b> | <b>First order</b> | <b>Higuchi</b> | <b>Hixon Crowell</b> | <b>Korsmeyer-Peppas</b> |       |
|-------------|-------------------|--------------------|----------------|----------------------|-------------------------|-------|
|             | $R^2$             | $R^2$              | $R^2$          | $R^2$                | $R^2$                   | $n$   |
| NAC1        | 0.9815            | 0.8812             | 0.9323         | 0.9924               | 0.9987                  | 0.415 |
| NAC2        | 0.9940            | 0.7760             | 0.9059         | 0.9901               | 0.9989                  | 0.489 |
| NAC3        | 0.8193            | 0.7686             | 0.9452         | 0.9878               | 0.9928                  | 0.480 |
| NAC4        | 0.9863            | 0.8821             | 0.9245         | 0.9933               | 0.9989                  | 0.430 |
| NAC5        | 0.9863            | 0.7821             | 0.9245         | 0.9933               | 0.9989                  | 0.430 |
| NAC6        | 0.9924            | 0.8751             | 0.9113         | 0.9893               | 0.9988                  | 0.474 |
| NAC7        | 0.9858            | 0.7736             | 0.9268         | 0.9886               | 0.9991                  | 0.425 |
| NAC8        | 0.9998            | 0.7726             | 0.9454         | 0.9895               | 0.9989                  | 0.462 |
| NAC9        | 0.8446            | 0.7815             | 0.9635         | 0.9963               | 0.9722                  | 0.486 |
| NAC10       | 0.9780            | 0.8757             | 0.9373         | 0.9883               | 0.9983                  | 0.490 |
| NAC11       | 0.9259            | 0.8810             | 0.9528         | 0.9958               | 0.9605                  | 0.479 |
| NAC12       | 0.9890            | 0.7765             | 0.9181         | 0.9904               | 0.9986                  | 0.449 |
| NAC13       | 0.9987            | 0.7571             | 0.8599         | 0.9752               | 0.9993                  | 0.444 |
| NAC14       | 0.9893            | 0.8776             | 0.9168         | 0.9899               | 0.9980                  | 0.455 |
| NAC15       | 0.9151            | 0.8791             | 0.9531         | 0.9953               | 0.9591                  | 0.470 |
| NAC16       | 0.9872            | 0.8881             | 0.9227         | 0.9966               | 0.9992                  | 0.435 |
| NAC17       | 0.9808            | 0.8926             | 0.9269         | 0.9959               | 0.9966                  | 0.413 |
